# Supplementary material for: Interactions of Echinacea spp. Root Extracts and Alkylamides With the Endocannabinoid System and Peripheral Inflammatory Pain
Source: PubMed Central journal article supplement (PMC8111300; doi:10.3389/fphar.2021.651292), 2021-04-27
Supplement: image1.pdf [file image1.pdf]

## Supplemental Material

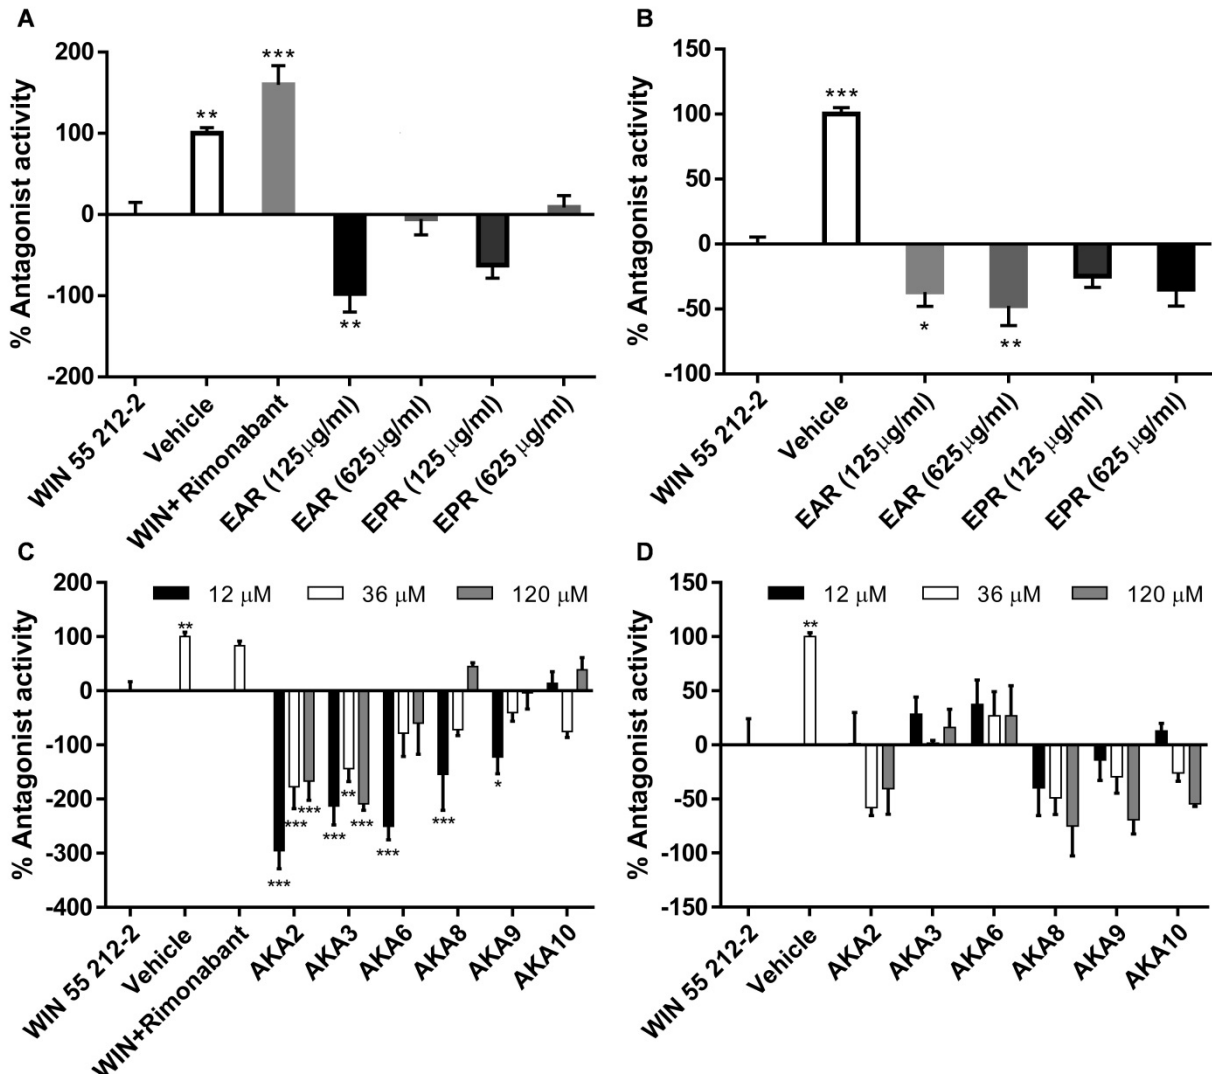

**Supplemental figure - CB receptor antagonist effects.** Mean antagonist effects of EAR (n=11) and EPR (n=9) extracts on CB1 (A) and CB2 (B) receptor internalization in the presence of agonist (WIN 55,212-2, 1 µM), expressed relative to agonist (with vehicle, 0% antagonist activity) and to the vehicle control (no CB activation, 100% antagonist activity). Rimonabant (SR141716, 10µM), the positive control, reversed agonist-induced internalization.. Mean antagonist effects of pure AKAs on CB1 (C) and CB2 (D) receptor in the presence of WIN 55,212-2 (1 µM). An analysis of variance (ANOVA) was performed to evaluate the variance between samples followed by Dunnett's test *post hoc* relative to the agonist (plus vehicle, 0.5 % ethanol) control. \*:  $p < 0.05$ ; \*\*:  $p < 0.01$ .
